# Supplementary material for: Neuroinflammation and protein pathology in Parkinson’s disease dementia
Source: Springer Nature journal article supplement (doi:10.1186/s40478-020-01083-5), 2020-12-01

**a**

## Substantia nigra

Control

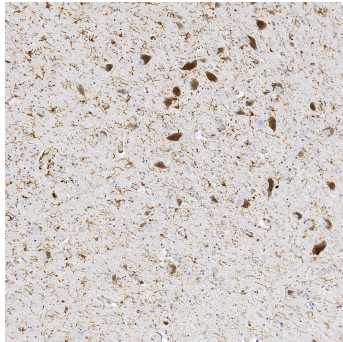

Parkinson's disease

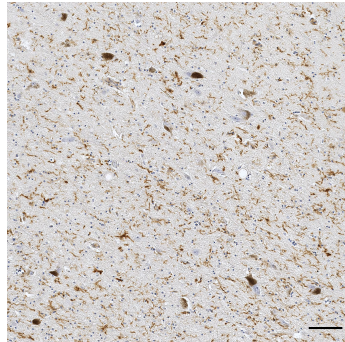

Microglia (Iba1)

**b**

Microglial activation

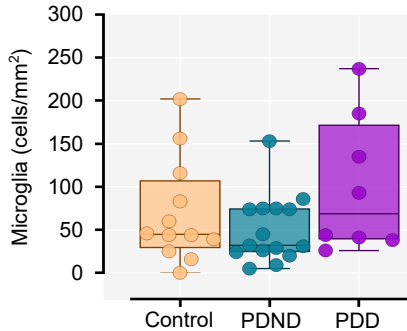

Supplement: MOESM1 [file 25667454]
