# Supplementary material for: Neuroinflammation and protein pathology in Parkinson’s disease dementia
Source: Springer Nature journal article supplement (doi:10.1186/s40478-020-01083-5), 2020-12-01
Supplement: MOESM3 [file 25667454]

**Supplementary Table 1. Spearman's rank-order correlation between pathological proteins and activated microglia.**

| Region                           |           | $\alpha$ -Synuclein |          | Tau    |          | Amyloid- $\beta$ |          |
|----------------------------------|-----------|---------------------|----------|--------|----------|------------------|----------|
|                                  |           | Rho                 | <i>p</i> | Rho    | <i>p</i> | Rho              | <i>p</i> |
| Amygdala (n=24)                  | Microglia | 0.448               | 0.028*   | 0.165  | 0.442    | 0.282            | 0.182    |
| Hippocampus (n=22)               |           | 0.410               | 0.052    | -0.020 | 0.929    | -0.027           | 0.907    |
| Entorhinal cortex (n=23)         |           | 0.360               | 0.091    | 0.193  | 0.376    | -0.287           | 0.195    |
| Occipitotemporal cortex (n=22)   |           | 0.362               | 0.098    | 0.210  | 0.348    | 0.305            | 0.178    |
| Prefrontal cortex (n=22)         |           | -0.043              | 0.849    | 0.240  | 0.281    | -0.173           | 0.441    |
| Posterior parietal cortex (n=28) |           | 0.085               | 0.668    | 0.471  | 0.013*   | 0.340            | 0.077    |

Rho: Spearman's correlation coefficient. \* $p < 0.05$ .
