# Supplementary material for: Neuroinflammation and protein pathology in Parkinson’s disease dementia
Source: Springer Nature journal article supplement (doi:10.1186/s40478-020-01083-5), 2020-12-01
Supplement: MOESM4 [file 25667454]

**Supplementary Table 2. Spearman's rank-order correlation between pathological proteins and infiltrating T lymphocytes in the amygdala.**

| Pathological protein | CD4 <sup>+</sup> lymphocytes |          | CD8 <sup>+</sup> lymphocytes |          |
|----------------------|------------------------------|----------|------------------------------|----------|
|                      | Rho                          | <i>p</i> | Rho                          | <i>p</i> |
| α-Synuclein          | 0.443                        | 0.034*   | 0.352                        | 0.108    |
| Tau                  | 0.420                        | 0.046*   | 0.569                        | 0.006**  |
| Amyloid-β            | 0.291                        | 0.179    | 0.160                        | 0.477    |

Rho: Spearman's correlation coefficient. n=23, \* $p < 0.05$ , \*\* $p < 0.01$ .
